# Supplementary material for: Rifabutin-Based Rescue Therapy for Helicobacter pylori Eradication: A Long-Term Prospective Study in a Large Cohort of Difficult-to-Treat Patients
Source: PubMed Central journal article supplement (PMC6406425; doi:10.3390/jcm8020199), 2019-02-06
Supplement: jcm-08-00199-s001.pdf [file jcm-08-00199-s001.pdf]

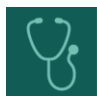

**Supplementary Table S1.** Eradication rate in the whole period.

|                                     | <b>Eradication Rate</b>                                                                         | <b><i>p</i>-value</b> |
|-------------------------------------|-------------------------------------------------------------------------------------------------|-----------------------|
| <b>Whole population</b>             | PP = 72.7% (216/297)<br>ITT = 71.5% (216/302)                                                   |                       |
| <b>Gender</b>                       | Males = 70.6% (84/119)<br>Females = 72.1% (132/183)                                             | 0.87                  |
| <b>Ethnic background</b>            | Italians = 71.1% (175/246)<br>Foreigners = 73.2% (41/56)                                        | 0.88                  |
| <b>Smoking habits</b>               | Active smokers = 73.5% (75/102)<br>Ex-smokers = 66.7% (42/63)<br>Never-smokers = 72.3% (99/137) | > 0.44                |
| <b>Family history (if known) GC</b> | Positive = 72% (67/93)<br>Negative = 70.7% (135/191)                                            | 0.92                  |

PP = Per-protocol; ITT = Intention-to-treat eradication; GC = gastric cancer

**Supplementary Table S2.** Eradication rate according to decade.

| <b>Treatment period</b>                | <b>June 2000-June 2010</b> | <b>July 2010-June 2017</b> | <b><i>p</i>-value</b> |
|----------------------------------------|----------------------------|----------------------------|-----------------------|
| <b>Whole population</b>                | ER = 77.8% (137/176)       | ER = 62.7% (79/126)        | 0.006                 |
| <b>Ethnic background</b>               |                            |                            |                       |
| • Italians                             | ER = 77.5% (117/151)       | ER = 61.1% (58/95)         | 0.009                 |
| • Foreigners                           | ER = 80% (20/25)           | ER = 67.7% (21/31)         | 0.46                  |
| <b>Smoking habits</b>                  |                            |                            |                       |
| • active smokers                       | NC = 32.4% (57/176)        | NC = 35.7% (45/126)        | >0.31                 |
| • ex-smokers                           | NC = 25% (44/176)          | NC = 15.1% (19/126)        |                       |
| • never-smokers                        | NC = 42.6% (75/176)        | NC = 49.2% (62/126)        |                       |
| <b>Sex</b>                             |                            |                            |                       |
| • male                                 | NC = 39.8 (70/176)         | NC = 38.9% (49/126)        | 0.97                  |
| • female                               | NC = 60.2 (106/176)        | NC = 61.1% (77/126)        |                       |
| <b>Family history (if known) of GC</b> |                            |                            |                       |
| • Positive                             | ER = 77.2% (34/44)         | ER = 67.3% (33/49)         | 0.9                   |
| • Negative                             | ER = 78.6% (92/117)        | ER = 58.1 % (43/74)        | 0.4                   |

ER = eradication rate; NC = number of cases; GC = gastric cancer

**Supplementary Table S3.** Multiple logistic regression analysis for eradication rate controlling for several potential confounders.

| Covariates                                 | Single variables |              |          | All variables |              |          |
|--------------------------------------------|------------------|--------------|----------|---------------|--------------|----------|
|                                            | OR               | 95%CI of OR  | p- value | ORs           | 95%CI of OR  | p- value |
| <b>Age</b>                                 | 1.001            | 0.997- 1.005 | 0.608    | 0.989         | 0.971- 1.009 | 0.283    |
| <b>Gender</b>                              |                  |              |          |               |              |          |
| Men                                        | 1.000            | -            | -        | 1.000         | -            | -        |
| Women                                      | 1.015            | 0.877- 1.279 | 0.870    | 1.097         | 0.805- 1.501 | 0.930    |
| <b>Ethnic background</b>                   |                  |              |          |               |              |          |
| Italians                                   | 1.000            | -            | -        | 1.000         | -            | -        |
| Foreigners                                 | 1.019            | 0.855- 1.302 | 0.880    | 1.125         | 0.798- 1.683 | 0.940    |
| <b><i>H. pylori</i> associated disease</b> |                  |              |          |               |              |          |
| PU disease                                 | 1.000            | -            | -        | 1.000         | -            | -        |
| Bleeding                                   | 0.902            | 0.932- 1.299 | 0.810    | 0.854         | 0.786- 1.451 | 0.890    |
| Perforation                                | N/A              |              |          | N/A           |              |          |
| Gastritis or functional dyspepsia          | 1.103            | 0.956- 1.199 | 0.820    | 1.090         | 0.905- 1.297 | 0.880    |
| <b>Smoking history</b>                     |                  |              |          |               |              |          |
| Active smokers                             | 1.000            | -            | -        | 1.000         | -            | -        |
| Ex-smokers                                 | 0.846            | 0.760- 1.307 | 0.640    | 0.903         | 0.811- 1.436 | 0.760    |
| Never-smokers                              | 1.286            | 0.860- 1.407 | 0.440    | 1.120         | 0.711- 1.436 | 0.560    |
| <b>Family history (if known) GC</b>        |                  |              |          |               |              |          |
| No                                         | 1.000            | -            | -        | 1.000         | -            | -        |
| Yes                                        | 0.933            | 0.903- 1.122 | 0.920    | 0.956         | 0.893- 1.368 | 0.940    |

OR = odds ratio; CI = confidence interval; *H. pylori* = *Helicobacter pylori*; PU = peptic ulcer; N/A = not applicable due to too low sample size; GC = gastric cancer

**Supplementary Table S4.** Multiple logistic regression analysis for eradication rate controlling for change in population features.

| Covariates                                           | Single variables |              |          | All variables |              |          |
|------------------------------------------------------|------------------|--------------|----------|---------------|--------------|----------|
|                                                      | OR               | 95%CI of OR  | p- value | ORs           | 95%CI of OR  | p- value |
| <b>Age variation</b><br>+2 ± 4 years                 | 0.967            | 0.937- 1.105 | 0.518    | 0.889         | 0.851- 1.209 | 0.728    |
| <b>Gender variation</b>                              |                  |              |          |               |              |          |
| Men<br>+ 3 ± 2%                                      | 0.983            | 0.954- 1.041 | 0.999    | 0.954         | 0.909- 1.095 | 0.990    |
| <b>Ethnic background variation</b>                   |                  |              |          |               |              |          |
| Italians<br>-10.4 ± 4.3%                             | 0.780            | 0.569- 0.899 | 0.005    | 0.799         | 0.502- 0.901 | 0.020    |
| <b><i>H. pylori</i> associated disease variation</b> |                  |              |          |               |              |          |
| PU disease<br>-2.3 ± 0.9%                            | 1.000            | -            | -        | 1.000         | -            | -        |
| Bleeding<br>-1.9 ± 0.8%                              | 0.932            | 0.892- 1.239 | 0.840    | 0.894         | 0.826- 1.351 | 0.780    |
| Perforation                                          | N/A              |              |          | N/A           |              |          |
| Gastritis or functional dyspepsia<br>+4.2 ± 1.9%     | 1.145            | 0.905- 1.259 | 0.891    | 1.097         | 0.805- 1.397 | 0.910    |
| <b>Smoking history variation</b>                     |                  |              |          |               |              |          |
| Active smokers<br>-2.0 ± 0.9%                        | 1.000            | -            | -        | 1.000         | -            | -        |
| Ex-smokers<br>+1.2 ± 0.8%                            | 0.946            | 0.870- 1.237 | 0.656    | 0.803         | 0.699- 1.566 | 0.870    |
| Never-smokers<br>+0.8 ± 0.7%                         | 1.268            | 0.956- 1.079 | 0.440    | 1.102         | 0.911- 1.136 | 0.470    |
| <b>Family history (if known) GC variation</b>        |                  |              |          |               |              |          |
| Yes                                                  | 0.943            | 0.907- 1.134 | 0.912    | 0.976         | 0.978- 1.168 | 0.950    |

OR = odds ratio; CI = confidence interval; *H. pylori* = *Helicobacter pylori*; PU = peptic ulcer; N/A = not applicable due to too low sample size; GC = gastric cancer
